# Supplementary material
Source: PubMed Central journal article supplement (PMC6697373)
Supplement: NIHMS1535563-supplement-1.pdf [file NIHMS1535563-supplement-1.pdf]

### **Supplementary Figures**

**Supplementary Figure 1: Daily ethanol intake in adolescent male and female C57BL/6J mice.** Daily intake profile of ethanol intake in the first exposure (PND28 to PND36) to 20% ethanol during adolescence using DID procedure for 9 days. Ethanol consumption in both male and female is relatively stable with trend to increase later on in both patterns. Shown are mean ethanol intake values  $\pm$  SEM of ethanol intake in g/kg in 4hrs (N=8 per group).

**Supplementary Figure 2: Daily intake profile of adult ethanol intake during the first phase of exposure.** Ethanol (20%) intake from PND72 to PND117 for adult male and female C57B/6J mice in the DID paradigm. Female consume significantly higher ethanol than male in days 6 and 7. Data are expressed as mean ethanol intake values  $\pm$  SEM. (N=8 per group).

**Supplementary Figure 3: Anxiety-like behaviors in adult C57BL/6J mice in the elevated plus maze test.** Mice were exposed to 20% v/v ethanol (E) vs. water (W) in the DID paradigm during adolescence and then tested at PND 72 with saline (Sal) or ethanol (EtOH) at 2 g/kg, i.p. and then tested 15 min later in the elevated plus maze test. Data is expressed as mean values  $\pm$  SEM. Panel (A) depicts % time spent in the open arms. Panel (B) depicts number of crossovers. (N=8 per group). \*  $p < 0.05$  as compared to saline control.

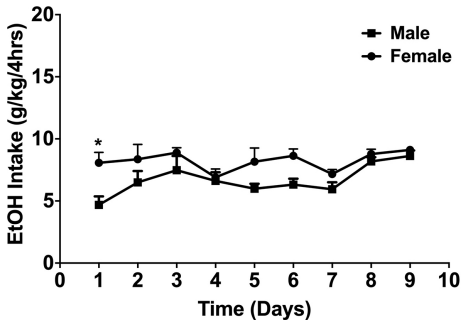

Supplementary Fig. 1

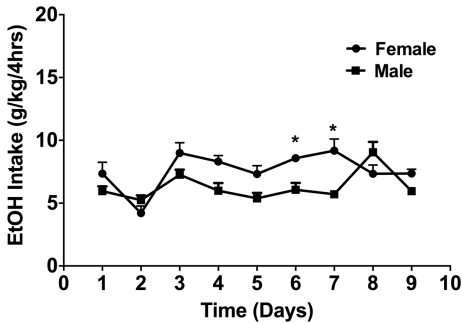

Supplementary Fig. 2

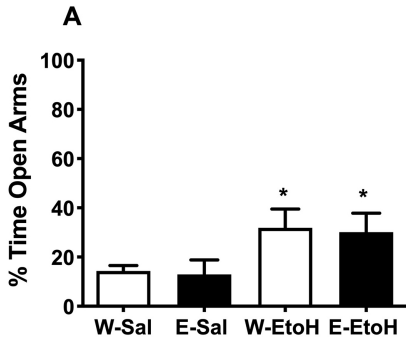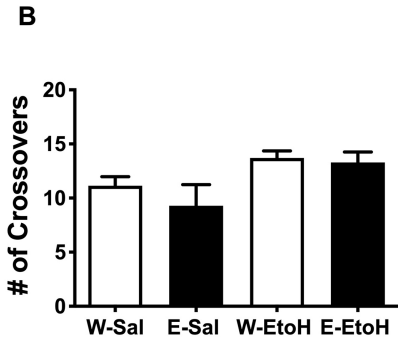

Supplementary Fig. 3
